# Supplementary material for: Physiologic Electrical Fields Direct Retinal Ganglion Cell Axon Growth In Vitro
Source: PubMed Central journal article supplement (PMC6716951; doi:10.1167/iovs.18-25118), 2019-08
Supplement: iovs-60-10-10_s03.pdf [file iovs-60-10-10_s03.pdf]

Supplemental Figure 1

A

|               | Control             | 50mV/mm             | 100mV/mm            | 200mV/mm             |
|---------------|---------------------|---------------------|---------------------|----------------------|
| n experiments | 10                  | 3                   | 3                   | 4                    |
| n axons       | 1234                | 871                 | 326                 | 303                  |
| Cathode       | 33.4% ( $\pm$ 4.3%) | 37.7% ( $\pm$ 7.6%) | 74.2% ( $\pm$ 7.6%) | 81.2% ( $\pm$ 9.3%)  |
| Anode         | 32.0% ( $\pm$ 5.0%) | 26.4% ( $\pm$ 8.3%) | 9.0% ( $\pm$ 4.9%)  | 4.8% ( $\pm$ 2.4%)   |
| Perpendicular | 34.6% ( $\pm$ 3.9%) | 35.9% ( $\pm$ 3.4%) | 16.8% ( $\pm$ 3.2%) | 14.1% ( $\pm$ 10.0%) |

B

|         |          | Cathode           |                   |          |          |
|---------|----------|-------------------|-------------------|----------|----------|
| Cathode |          | Control           | 50mV/mm           | 100mV/mm | 200mV/mm |
|         | Control  | N/A               |                   |          |          |
|         | 50mV/mm  | 0.6646            | N/A               |          |          |
|         | 100mV/mm | <b>&lt;0.0001</b> | <b>&lt;0.0001</b> | N/A      |          |
|         | 200mV/mm | <b>&lt;0.0001</b> | <b>&lt;0.0001</b> | 0.3856   | N/A      |

|       |          | Anode             |                   |          |          |
|-------|----------|-------------------|-------------------|----------|----------|
| Anode |          | Control           | 50mV/mm           | 100mV/mm | 200mV/mm |
|       | Control  | N/A               |                   |          |          |
|       | 50mV/mm  | 0.4516            | N/A               |          |          |
|       | 100mV/mm | <b>&lt;0.0001</b> | <b>0.0027</b>     | N/A      |          |
|       | 200mV/mm | <b>&lt;0.0001</b> | <b>&lt;0.0001</b> | 0.7710   | N/A      |

|               |          | Perpendicular     |                   |          |          |
|---------------|----------|-------------------|-------------------|----------|----------|
| Perpendicular |          | Control           | 50mV/mm           | 100mV/mm | 200mV/mm |
|               | Control  | N/A               |                   |          |          |
|               | 50mV/mm  | 0.9856            | N/A               |          |          |
|               | 100mV/mm | <b>0.0001</b>     | <b>0.0009</b>     | N/A      |          |
|               | 200mV/mm | <b>&lt;0.0001</b> | <b>&lt;0.0001</b> | 0.9255   | N/A      |

**Figure S1: Retinal neurites grow towards the cathode in the presence of an electrical field.** Retinal explant cultures were grown for 18 hours, then exposed to an EF for 4 hours. (A) Percent of total axons projecting towards the cathode, anode, or perpendicular to the EF (see METHODS). Values represent mean with SD. Number of experiments and total axons quantified are listed per condition. (B) P-values from two-way analysis of variance of data of (A) with Tukey's multiple comparisons test.
