# Supplementary material for: Physiologic Electrical Fields Direct Retinal Ganglion Cell Axon Growth In Vitro
Source: PubMed Central journal article supplement (PMC6716951; doi:10.1167/iovs.18-25118), 2019-08
Supplement: iovs-60-10-10_s04.pdf [file iovs-60-10-10_s04.pdf]

Supplemental Figure 2

A

|               | Control             | 50mV/mm             | 100mV/mm           | 200mV/mm            |
|---------------|---------------------|---------------------|--------------------|---------------------|
| n experiments | 9                   | 3                   | 3                  | 3                   |
| n axons       | 66                  | 67                  | 48                 | 131                 |
| Directedness  | -0.34 ( $\pm$ 0.47) | -0.16 ( $\pm$ 0.60) | 0.03 ( $\pm$ 0.59) | -0.28 ( $\pm$ 0.62) |

B

|          | Control | 50mV/mm | 100mV/mm | 200mV/mm |
|----------|---------|---------|----------|----------|
| Control  | N/A     |         |          |          |
| 50mV/mm  | 0.9517  | N/A     |          |          |
| 100mV/mm | 0.7099  | 0.9687  | N/A      |          |
| 200mV/mm | 0.9981  | 0.9914  | 0.8808   | N/A      |

**Figure S2: Retinal neurites exhibit cathode-directed growth.** (A) Average directedness of retinal neurites was calculated from cultures described in Figure 1. Number of experiments and total axons quantified are listed per condition. Values represent mean with SD. (B) P-values from one-way analysis of variance of data of (A) with Tukey's multiple comparisons test.
