# Supplementary material for: Physiologic Electrical Fields Direct Retinal Ganglion Cell Axon Growth In Vitro
Source: PubMed Central journal article supplement (PMC6716951; doi:10.1167/iovs.18-25118), 2019-08
Supplement: iovs-60-10-10_s06.pdf [file iovs-60-10-10_s06.pdf]

Supplemental Figure 4

A

| Percent total axons | Changed towards "new" cathode | Changed towards "new" anode | No reaction to change in EF polarity | n experiment | n axons |
|---------------------|-------------------------------|-----------------------------|--------------------------------------|--------------|---------|
| Control             | 36% ( $\pm$ 7%)               | 39% ( $\pm$ 8%)             | 25% ( $\pm$ 6%)                      | 4            | 271     |
| 200 mV/mm           | 78% ( $\pm$ 10%)              | 14% ( $\pm$ 12%)            | 8% ( $\pm$ 6%)                       | 4            | 162     |

B

| Two-way ANOVA        | Changed towards "new" cathode | Changed towards "new" anode | No reaction to change in EF polarity |
|----------------------|-------------------------------|-----------------------------|--------------------------------------|
| Control vs 200 mV/mm | <b>&lt;0.0001</b>             | <b>0.0017</b>               | <b>0.0320</b>                        |

C

| Average Directedness | Culture 0-4 hours; Cathode towards left | Culture 4-8 hours; Cathode towards right | Net change in axon directedness |
|----------------------|-----------------------------------------|------------------------------------------|---------------------------------|
| Control              | 0.03 $\pm$ 0.23                         | 0.08 $\pm$ 0.10                          | 0.05 $\pm$ 0.13                 |
| 200 mV/mm            | -0.47 $\pm$ 0.15                        | +0.60 $\pm$ 0.22                         | 1.07 $\pm$ 0.31                 |

D

| Two-way ANOVA               | Control Culture T=0-4 hrs | Control Culture T=4-8 hrs | EF Culture Cathode to left | EF Culture Cathode to right |
|-----------------------------|---------------------------|---------------------------|----------------------------|-----------------------------|
| Control Culture T=0-4 hrs   | N/A                       | 0.9994                    | <b>0.0134</b>              | <b>0.0051</b>               |
| Control Culture T=4-8 hrs   |                           | N/A                       | <b>0.0067</b>              | <b>0.0101</b>               |
| EF Culture Cathode to left  |                           |                           | N/A                        | <b>&lt;0.0001</b>           |
| EF Culture Cathode to right |                           |                           |                            | N/A                         |

E

| Number of minutes elapsed after switch in EF polarity | Average percent total axons observed switching ( $\pm$ standard deviation) |
|-------------------------------------------------------|----------------------------------------------------------------------------|
| 15                                                    | 21.27 ( $\pm$ 11.05)                                                       |
| 30                                                    | 22.14 ( $\pm$ 17.01)                                                       |
| 45                                                    | 12.39 ( $\pm$ 6.04)                                                        |
| 60                                                    | 3.91 ( $\pm$ 5.25)                                                         |
| 75                                                    | 9.54 ( $\pm$ 8.62)                                                         |
| 90                                                    | 2.06 ( $\pm$ 2.40)                                                         |
| 105                                                   | 2.77 ( $\pm$ 5.55)                                                         |
| 120                                                   | 4.12 ( $\pm$ 4.81)                                                         |
| 135                                                   | 4.54 ( $\pm$ 9.09)                                                         |
| 150                                                   | 5.76 ( $\pm$ 4.69)                                                         |
| 165                                                   | 5.83 ( $\pm$ 4.72)                                                         |
| 180                                                   | 2.77 ( $\pm$ 5.55)                                                         |
| 195                                                   | 2.85 ( $\pm$ 3.67)                                                         |

**Figure S4: RGC axons change direction of growth in response to reversal in EF polarity.** Explants were grown overnight for 12 hours, then exposed to an EF of 200 mV/mm for 4 hours. The polarity of the EF was then reversed by 180 degrees and cultures were observed for another 4 hours. The percent of axons seen re-directing their growth after the EF switch towards the “new” cathode, “new” anode, vs no reaction to was quantified and shown in (A), see METHODS. Number of experiments and total axons quantified are listed per condition. Values represent mean with SD. (B) P-values from two-way analysis of variance of data from (A). (C) Measurement of average culture directedness (see METHODS) shows increased rightward shift (towards “new” cathode) in EF treated cultures compared to control cultures. (D) P-values from two-way analysis of variance of experiment described in (C). (E) Of the axons that redirected their growth towards the “new” cathode in (B), the number of time elapsed since the EF switch for this change in direction to be observed was tallied and recorded. Error represents SD.
