# Supplementary material for: Physiologic Electrical Fields Direct Retinal Ganglion Cell Axon Growth In Vitro
Source: PubMed Central journal article supplement (PMC6716951; doi:10.1167/iovs.18-25118), 2019-08
Supplement: iovs-60-10-10_s07.pdf [file iovs-60-10-10_s07.pdf]

Supplemental Figure 5

A

| % total axons | 200mV/mm + ToxinB   |                     |                     |                     |                     |
|---------------|---------------------|---------------------|---------------------|---------------------|---------------------|
|               | 0 ng/ml             | 0.1 ng/ml           | 0.5 ng/ml           | 1 ng/ml             | 10 ng/ml            |
| Cathode       | 78% ( $\pm$ 6%)     | 84% ( $\pm$ 9%)     | 81% ( $\pm$ 8%)     | 57% ( $\pm$ 6%)     | 61% ( $\pm$ 4%)     |
| Anode         | 12% ( $\pm$ 6%)     | 8% ( $\pm$ 7%)      | 6% ( $\pm$ 1%)      | 25% ( $\pm$ 2%)     | 17% ( $\pm$ 3%)     |
| Perpendicular | 10% ( $\pm$ 6%)     | 8% ( $\pm$ 3%)      | 13% ( $\pm$ 8%)     | 18% ( $\pm$ 8%)     | 22% ( $\pm$ 3%)     |
| Directedness  | -0.61 ( $\pm$ 0.06) | -0.66 ( $\pm$ 0.01) | -0.67 ( $\pm$ 0.08) | -0.31 ( $\pm$ 0.04) | -0.37 ( $\pm$ 0.07) |
| n experiment  | 13                  | 3                   | 3                   | 4                   | 3                   |
| n axons       | 849                 | 154                 | 110                 | 478                 | 224                 |

B

| % total axons |                      |           | Cathode           |                   |                   |         |          |
|---------------|----------------------|-----------|-------------------|-------------------|-------------------|---------|----------|
|               |                      |           | 200mV/mm + ToxinB |                   |                   |         |          |
|               |                      |           | 0 ng/ml           | 0.1 ng/ml         | 0.5 ng/ml         | 1 ng/ml | 10 ng/ml |
| Cathode       | 200mV/mm<br>+ ToxinB | 0 ng/ml   | N/A               |                   |                   |         |          |
|               |                      | 0.1 ng/ml | 0.9567            | N/A               |                   |         |          |
|               |                      | 0.5 ng/ml | >0.9999           | >0.9999           | N/A               |         |          |
|               |                      | 1 ng/ml   | <b>&lt;0.0001</b> | <b>&lt;0.0001</b> | <b>&lt;0.0001</b> | N/A     |          |
|               |                      | 10 ng/ml  | <b>0.0027</b>     | <b>0.0011</b>     | <b>0.0084</b>     | 0.9999  | N/A      |

| % total axons |                      |           | Anode             |               |               |         |          |
|---------------|----------------------|-----------|-------------------|---------------|---------------|---------|----------|
|               |                      |           | 200mV/mm + ToxinB |               |               |         |          |
|               |                      |           | 0 ng/ml           | 0.1 ng/ml     | 0.5 ng/ml     | 1 ng/ml | 10 ng/ml |
| Anode         | 200mV/mm<br>+ ToxinB | 0 ng/ml   | N/A               |               |               |         |          |
|               |                      | 0.1 ng/ml | 0.9991            | N/A           |               |         |          |
|               |                      | 0.5 ng/ml | 0.9567            | >0.9999       | N/A           |         |          |
|               |                      | 1 ng/ml   | <b>0.0209</b>     | <b>0.0264</b> | <b>0.0068</b> | N/A     |          |
|               |                      | 10 ng/ml  | 0.9910            | 0.8631        | 0.6127        | 0.9018  | N/A      |

| % total axons |                      |           | Perpendicular     |           |           |         |          |
|---------------|----------------------|-----------|-------------------|-----------|-----------|---------|----------|
|               |                      |           | 200mV/mm + ToxinB |           |           |         |          |
|               |                      |           | 0 ng/ml           | 0.1 ng/ml | 0.5 ng/ml | 1 ng/ml | 10 ng/ml |
| Perpendicular | 200mV/mm<br>+ ToxinB | 0 ng/ml   | N/A               |           |           |         |          |
|               |                      | 0.1 ng/ml | >0.9999           | N/A       |           |         |          |
|               |                      | 0.5 ng/ml | >0.9999           | 0.9992    | N/A       |         |          |
|               |                      | 1 ng/ml   | 0.5512            | 0.6570    | 0.9985    | N/A     |          |
|               |                      | 10 ng/ml  | 0.1267            | 0.2277    | 0.8631    | >0.9999 | N/A      |

| Directedness         |           | 200mV/mm + ToxinB |           |           |         |          |
|----------------------|-----------|-------------------|-----------|-----------|---------|----------|
|                      |           | 0 ng/ml           | 0.1 ng/ml | 0.5 ng/ml | 1 ng/ml | 10 ng/ml |
| + ToxinB<br>200mV/mm | 0 ng/ml   | N/A               |           |           |         |          |
|                      | 0.1 ng/ml | 0.9247            | N/A       |           |         |          |
|                      | 0.5 ng/ml | 0.6817            | >0.9999   | N/A       |         |          |
|                      | 1 ng/ml   | <0.0001           | <0.0001   | <0.0001   | N/A     |          |
|                      | 10 ng/ml  | <0.0001           | 0.0006    | <0.0001   | 0.8951  | N/A      |

C

| % total axons | No EF               | 1 ng/ml ToxinB     |
|---------------|---------------------|--------------------|
| Cathode       | 34% ( $\pm$ 3%)     | 31% ( $\pm$ 1%)    |
| Anode         | 30% ( $\pm$ 3%)     | 36% ( $\pm$ 4%)    |
| Perpendicular | 36% ( $\pm$ 1%)     | 33% ( $\pm$ 6%)    |
| Directedness  | -0.06 ( $\pm$ 0.03) | 0.06 ( $\pm$ 0.02) |
| n experiment  | 3                   | 3                  |
| n axons       | 121                 | 154                |

D

|              |               | 1ng/ml ToxinB |        |               |
|--------------|---------------|---------------|--------|---------------|
|              |               | Cathode       | Anode  | Perpendicular |
| Control      | Cathode       | >0.9999       |        |               |
|              | Anode         |               | 0.9991 |               |
|              | Perpendicular |               |        | >0.9999       |
| Directedness |               | 0.1624        |        |               |

**Figure S5: ToxinB partially neutralizes cathode-directed growth of RGC axons.** Explants were grown overnight in varying concentrations of ToxinB, then exposed to an EF of 200 mV/mm. ToxinB was replenished 1 hour before initiating EF exposure. (A) Average neurite directedness and percent axons growing towards the cathode, anode, or perpendicular to the EF was quantified (see METHODS). Number of experiments and total axons quantified are listed per condition. Error represent SD. (B) P-values for two-way analysis of variance performed on data in (A) with Tukey's multiple comparisons test. (C) Explants were grown overnight in 1ng/ml of ToxinB. ToxinB was replenished 1 hour before initiating time-lapsed microscopy. Average neurite directedness and percent axons growing towards the cathode, anode, or perpendicular to the EF was quantified. Number of experiments and total axons quantified are listed per condition. Error represent SD. (D) P-values for two-way analysis of variance performed on data in (C) with Tukey's multiple comparisons test.
