# Supplementary material for: Physiologic Electrical Fields Direct Retinal Ganglion Cell Axon Growth In Vitro
Source: PubMed Central journal article supplement (PMC6716951; doi:10.1167/iovs.18-25118), 2019-08
Supplement: iovs-60-10-10_s08.pdf [file iovs-60-10-10_s08.pdf]

Supplemental Figure 6

A

| Rate of axon growth ( $\mu\text{m/hr}$ ) | No EF              |                    | 200mV/mm + ToxinB |                   |                   |
|------------------------------------------|--------------------|--------------------|-------------------|-------------------|-------------------|
|                                          | 0 ng/ml            | 1 ng/ml            | 0 ng/ml           | 1 ng/ml           | 10 ng/ml          |
| Cathode                                  | 40.2 ( $\pm$ 7.2)  | 44.3 ( $\pm$ 8.2)  | 45.2 ( $\pm$ 7.8) | 43.2 ( $\pm$ 3.4) | 46.7 ( $\pm$ 9.3) |
| Anode                                    | 37.7 ( $\pm$ 7.1)  | 43.3 ( $\pm$ 5.3)  | 42.7 ( $\pm$ 4.2) | 29.0 ( $\pm$ 7.8) | 43.6 ( $\pm$ 4.8) |
| Perpendicular                            | 39.1 ( $\pm$ 13.5) | 44.4 ( $\pm$ 10.5) | 39.8 ( $\pm$ 6.6) | 30.2 ( $\pm$ 5.5) | 43.1 ( $\pm$ 3.1) |
| n experiment                             | 3                  | 3                  | 6                 | 3                 | 3                 |
| n axons                                  | 121                | 154                | 271               | 173               | 122               |

B

| Rate of axon growth ( $\mu\text{m/hr}$ ) |          |          | Cathode |         |          |         |          |
|------------------------------------------|----------|----------|---------|---------|----------|---------|----------|
|                                          |          |          | No EF   |         | 200mV/mm |         |          |
|                                          |          |          | 0 ng/ml | 1 ng/ml | 0 ng/ml  | 1 ng/ml | 10 ng/ml |
| Cathode                                  | No EF    | 0 ng/ml  | N/A     |         | 0.9996   | >0.9999 | 0.9992   |
|                                          |          | 1 ng/ml  | >0.9999 | N/A     | >0.9999  | >0.9999 | >0.9999  |
|                                          | 200mV/mm | 0 ng/ml  |         |         | N/A      |         |          |
|                                          |          | 1 ng/ml  |         |         | >0.9999  | N/A     |          |
|                                          |          | 10 ng/ml |         |         | >0.9999  | >0.9999 | N/A      |

| Rate of axon growth ( $\mu\text{m/hr}$ ) |          |          | Anode   |         |          |         |          |
|------------------------------------------|----------|----------|---------|---------|----------|---------|----------|
|                                          |          |          | No EF   |         | 200mV/mm |         |          |
|                                          |          |          | 0 ng/ml | 1 ng/ml | 0 ng/ml  | 1 ng/ml | 10 ng/ml |
| Anode                                    | No EF    | 0 ng/ml  | N/A     |         | 0.9996   | 0.9771  | >0.9999  |
|                                          |          | 1 ng/ml  | 0.9998  | N/A     | >0.9999  | 0.5594  | >0.9999  |
|                                          | 200mV/mm | 0 ng/ml  |         |         | N/A      |         |          |
|                                          |          | 1 ng/ml  |         |         | 0.3893   | N/A     |          |
|                                          |          | 10 ng/ml |         |         | >0.9999  | 0.6284  | N/A      |

| Rate of axon growth ( $\mu\text{m/hr}$ ) |          |          | Perpendicular |         |          |         |          |
|------------------------------------------|----------|----------|---------------|---------|----------|---------|----------|
|                                          |          |          | No EF         |         | 200mV/mm |         |          |
|                                          |          |          | 0 ng/ml       | 1 ng/ml | 0 ng/ml  | 1 ng/ml | 10 ng/ml |
| Perpendicular                            | No EF    | 0 ng/ml  | N/A           |         | >0.9999  | 0.9748  | >0.9999  |
|                                          |          | 1 ng/ml  | 0.9999        | N/A     | 0.9999   | 0.5724  | >0.9999  |
|                                          | 200mV/mm | 0 ng/ml  |               |         | N/A      |         |          |
|                                          |          | 1 ng/ml  |               |         | 0.8753   | N/A     |          |
|                                          |          | 10 ng/ml |               |         | >0.9999  | 0.8525  | N/A      |

**Figure S6: ToxinB does not affect rate of RGC axon growth.** Explants were grown overnight in 1ng/ml or 10ng/ml of ToxinB, then exposed to an EF of 200 mV/mm. ToxinB was replenished 1 hour before initiating EF exposure. The effect of 1ng/ml and 10ng/ml of ToxinB on rate of axon growth was quantified and shown in (A). Number of experiments and total axons quantified are listed per condition. Error represent SD. (B) P-values for two-way analysis of variance performed on data in (A) with Tukey's multiple comparisons test.
