# Supplementary material for: Physiologic Electrical Fields Direct Retinal Ganglion Cell Axon Growth In Vitro
Source: PubMed Central journal article supplement (PMC6716951; doi:10.1167/iovs.18-25118), 2019-08
Supplement: iovs-60-10-10_s09.pdf [file iovs-60-10-10_s09.pdf]

Supplemental Figure 7

A

| % total axons | Control             | 100 $\mu$ M<br>Z62954982 |
|---------------|---------------------|--------------------------|
| Cathode       | 66% ( $\pm$ 6%)     | 31% ( $\pm$ 4%)          |
| Anode         | 10% ( $\pm$ 8%)     | 31% ( $\pm$ 3%)          |
| Perpendicular | 25% ( $\pm$ 1%)     | 39% ( $\pm$ 3%)          |
| Directedness  | -0.49 ( $\pm$ 0.13) | -0.02 ( $\pm$ 0.08)      |
| n experiments | 3                   | 3                        |
| n axons       | 175                 | 152                      |

B

| Rate of axon growth ( $\mu$ m/hr) | Control            | 100 $\mu$ M<br>Z62954982 |
|-----------------------------------|--------------------|--------------------------|
| Cathode                           | 45.6 ( $\pm$ 15.1) | 33.0 ( $\pm$ 6.6)        |
| Anode                             | 32.0 ( $\pm$ 8.9)  | 26.4 ( $\pm$ 13.2)       |
| Perpendicular                     | 40.1 ( $\pm$ 16.0) | 33.0 ( $\pm$ 11.7)       |
| n experiments                     | 3                  | 3                        |
| n axons                           | 175                | 152                      |

C

| % total axons |               | 100 $\mu$ M Z62954982 |        |               |
|---------------|---------------|-----------------------|--------|---------------|
|               |               | Cathode               | Anode  | Perpendicular |
| Control       | Cathode       | <b>0.0216</b>         |        |               |
|               | Anode         |                       | 0.3630 |               |
|               | Perpendicular |                       |        | 0.2992        |
|               | Directedness  | <b>0.0062</b>         |        |               |

D

| Rate of axon growth ( $\mu$ m/hr) |               | 100 $\mu$ M Z62954982 |        |               |
|-----------------------------------|---------------|-----------------------|--------|---------------|
|                                   |               | Cathode               | Anode  | Perpendicular |
| Control                           | Cathode       | 0.1479                |        |               |
|                                   | Anode         |                       | 0.6813 |               |
|                                   | Perpendicular |                       |        | 0.5261        |

**Figure S7: Rac1 inhibitor Z62954982 neutralizes cathode-directed growth.** Explants were grown overnight, then treated with 100mM Z62954982. Two hours later, cultures were exposed to an EF of 200 mV/mm. (A) The percentage of RGC axons growing towards the cathode, anode, versus perpendicular to the EF was quantified. Number of experiments and total axons quantified are listed per condition. Error represent SD. (B) Z62954982 effect on rate of axon growth was also quantified. Number of experiments and total axons

quantified are listed per condition. Error represent SD. (C-D) P-values for two-way ANOVA with Sidak's multiple comparison test of values from (A) and (B), respectively.
