# Supplementary material for: Physiologic Electrical Fields Direct Retinal Ganglion Cell Axon Growth In Vitro
Source: PubMed Central journal article supplement (PMC6716951; doi:10.1167/iovs.18-25118), 2019-08
Supplement: iovs-60-10-10_s10.pdf [file iovs-60-10-10_s10.pdf]

Supplemental Figure 8

A

Relative Rac1-GTP Levels

| Duration of EF Exposure  | 0 mins            | 30 mins            | 60 mins            | 150 mins           | 240 mins            | 300 mins<br>(240 mins + 60 mins without EF) |
|--------------------------|-------------------|--------------------|--------------------|--------------------|---------------------|---------------------------------------------|
| Relative Rac1-GTP Levels | 100%<br>(± 61.5%) | 57.7%<br>(± 23.2%) | 53.5%<br>(± 35.5%) | 77.0%<br>(± 34.0%) | 153.6%<br>(± 45.6%) | 76.0%<br>(± 47.8%)                          |
| n experiments            | 10                | 7                  | 5                  | 5                  | 5                   | 6                                           |

B

| One-way ANOVA                               | 0 mins | 30 mins       | 60 mins       | 150 mins | 240 mins | 300 mins<br>(240 mins + 60 mins without EF) |
|---------------------------------------------|--------|---------------|---------------|----------|----------|---------------------------------------------|
| 0 mins                                      | N/A    |               |               |          |          |                                             |
| 30 mins                                     | 0.4306 | N/A           |               |          |          |                                             |
| 60 mins                                     | 0.4444 | >0.9999       | N/A           |          |          |                                             |
| 150 mins                                    | 0.9381 | 0.9777        | 0.9631        | N/A      |          |                                             |
| 240 mins                                    | 0.2920 | <b>0.0128</b> | <b>0.0174</b> | 0.1135   | N/A      |                                             |
| 300 mins<br>(240 mins + 60 mins without EF) | 0.9072 | 0.9781        | 0.9635        | >0.9999  | 0.0816   | N/A                                         |

**Figure S8: Rac1-GTP levels increase after 4 hours of EF exposure in RGCs.** Cultures of purified RGCs were grown overnight then exposed to an EF of 200 mV/mm for varying durations of time. (A) Level of Rac1-GTP relative to control cultures was quantified from cell lysates. (B) P-values for one-way ANOVA test performed on data in (A) with Tukey's multiple comparisons test.
